# Supplementary material
Source: PubMed Central journal article supplement (PMC7956909)

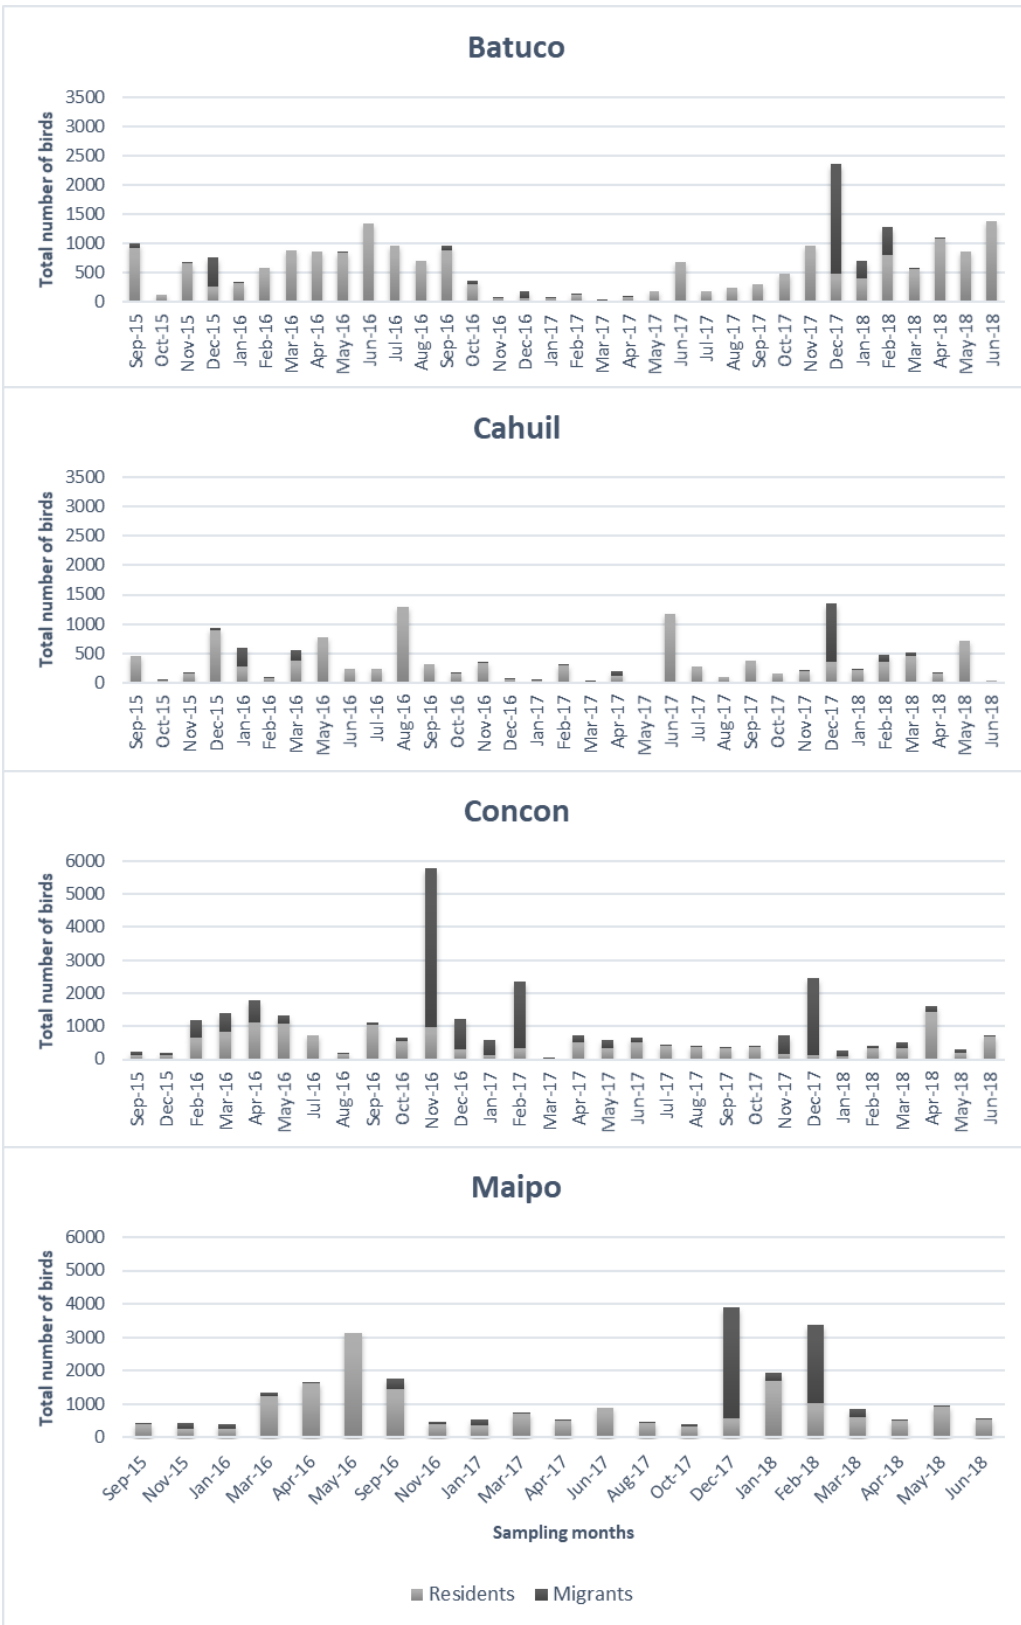

Supplement: NIHMS1631560-supplement-Supp_fig-3.pdf [file NIHMS1631560-supplement-Supp_fig-3.pdf]
